# Supplementary material for: Flightless I is a catabolic factor of chondrocytes that promotes hypertrophy and cartilage degeneration in osteoarthritis
Source: PubMed Central journal article supplement — iScience. 2021 May 24;24(6):102643. doi: 10.1016/j.isci.2021.102643 (PMC8187833; doi:10.1016/j.isci.2021.102643), 2021-05-24
Supplement: mmc1.pdf [file mmc1.pdf]

**Supplemental information**

**Flightless I is a catabolic factor of chondrocytes  
that promotes hypertrophy and cartilage  
degeneration in osteoarthritis**

**Taku Ebata, Mohamad Alaa Terkawi, Masanari Hamasaki, Gen Matsumae, Tomohiro Onodera, Mahmoud Khamis Aly, Shunichi Yokota, Hend Alhasan, Tomohiro Shimizu, Daisuke Takahashi, Kentaro Homan, Ken Kadoya, and Norimasa Iwasaki**

## **Supplemental information**

### **Supplementary Tables**

**Supplementary Table 1. Primer list used in this study, related to the STAR Methods**

**Supplementary Table 2. Antibodies list used in this study, related to the STAR Methods.**

**Supplementary Table 1.** Primer list used in this study, related to the STAR Methods.

| <b>Target</b>   | <b>Forward</b>        | <b>Reverse</b>        |
|-----------------|-----------------------|-----------------------|
| <i>Gapdh</i>    | TGCAGCGAACTTTATTGATG  | ACTTTGTCAAGCTCATTTC   |
| <i>Fli1</i>     | CGCTACAGAACCAGCTGAGG  | CTGCAGCAGCAGCCACT     |
| <i>Mmp13</i>    | TTGGCCACTCCCTAGGTCTG  | GGTTGGGGTCTTCATCGC    |
| <i>Adamts 5</i> | GCATGCGCGCTACACTCTAA  | TCGCGGTTGTAGACATGCAG  |
| <i>Mmp3</i>     | TTCTGGGCTATACGAGGGCA  | TTCTTCACGGTTGCAGGGAG  |
| <i>Col2A1</i>   | CTCATCTTGCCGCATCTGTGT | GTCATCGCAGAGGACATTCCC |
| <i>Aggrecan</i> | CCCTCACCCCAAGAATCAAG  | GGATAGTTGGGGAGCGACAC  |
| <i>Runx2</i>    | GCGCATTCCCTCATCCCAGTA | ACTTGGTGCAGAGTTCAGGG  |

**Supplementary Table 2.** Antibodies list used in this study, related to the STAR Methods.

| <b>Antibody</b>                 | <b>Dilution</b> | <b>Manufacturer</b>             | <b>Research Resource Identifier (RRID)</b> |
|---------------------------------|-----------------|---------------------------------|--------------------------------------------|
| <i>Flightless I</i>             | 1:1000          | GeneTex                         | AB_10727618                                |
| <i>MMP13</i>                    | 1:500           | Abcam                           | AB_776416                                  |
| <i>ADAMTS5</i>                  | 1:1000          | GeneTex                         | AB_1240417                                 |
| <i>MMP3</i>                     | 1:1000          | Abcam                           | AB_881281                                  |
| <i>RUNX2</i>                    | 1:1000          | BioLegend                       | AB_2632769                                 |
| <i>VEGFa</i>                    | 1:1000          | BioLegend                       | AB_2212504                                 |
| <i>c-Myc</i>                    | 1:1000          | Cell signaling                  | AB_2151827                                 |
| <i>pc-Myc</i>                   | 1:1000          | Cell signaling                  | AB_2151830                                 |
| <i>COL X</i>                    | 1:250           | Abcam                           | AB_879742                                  |
| <i>ERK1/2</i>                   | 1:1000          | Cell signaling                  | AB_390779                                  |
| <i>pERK1/2</i>                  | 1:1000          | Cell signaling                  | AB_2315112                                 |
| <i>P38 MAPK</i>                 | 1:1000          | Cell signaling                  | AB_10999090                                |
| <i>pP38<br/>MAPK</i>            | 1:1000          | Cell signaling                  | AB_2139682                                 |
| <i>SAPK-JNK</i>                 | 1:1000          | Cell signaling                  | AB_2250373                                 |
| <i>pSAPK-<br/>JNK</i>           | 1:1000          | Cell signaling                  | AB_823588                                  |
| <i>MEK1/2</i>                   | 1:1000          | Cell signaling                  | AB_10829473                                |
| <i>pMEK1/2</i>                  | 1:500           | Cell signaling                  | AB_331648                                  |
| <i>TLR4/MD2</i>                 | 1:1000          | BioLegend                       | AB_313789                                  |
| <i><math>\beta</math> actin</i> | 1:2000          | Applied Biological<br>Materials | AB_2631287                                 |
